# Supplementary material
Source: PubMed Central journal article supplement (PMC4136025)
Supplement: AAC.02413-14_zac008143083so1.pdf [file AAC.02413-14_zac008143083so1.pdf]

## **Pregnancy outcome after first trimester exposure to fluoroquinolones: an observational cohort study**

Stephanie Padberg,<sup>a</sup> Evelin Wacker,<sup>a</sup> Reinhard Meister,<sup>b</sup> Mary Panse,<sup>a</sup> Corinna Weber-Schoendorfer,<sup>a</sup> Marc Oppermann,<sup>a</sup> Christof Schaefer<sup>a</sup>

Pharmakovigilanz- und Beratungszentrum für Embryonaltoxikologie (Institute for Clinical Teratology and Drug Risk Assessment in Pregnancy), Charité Universitätsmedizin Berlin, Berlin, Germany<sup>a</sup>

Department of Mathematics, Beuth Hochschule für Technik Berlin (University of Applied Sciences), Berlin, Germany<sup>b</sup>

### **Supplementary material**

#### **Table of content**

|                                                                                                           |   |
|-----------------------------------------------------------------------------------------------------------|---|
| <b>Figure S1</b> Percentiles of birth weights                                                             | 2 |
| <b>Figure S2</b> Birth defects and exposure time window of the fluoroquinolone cohort                     | 3 |
| <b>Table S1</b> Treatment indication for fluoroquinolone therapy                                          | 4 |
| <b>Table S2</b> Gestational week at elective termination of pregnancy and reason for ETOP                 | 5 |
| <b>Table S3</b> Minor birth defects in the fluoroquinolone cohort                                         | 6 |
| <b>Table S4</b> Congenital anomalies with chromosomal or genetic background in the fluoroquinolone cohort | 7 |
| <b>Table S5</b> Major birth defects ordered by organ system                                               | 8 |

# Fluoroquinolones and pregnancy outcome

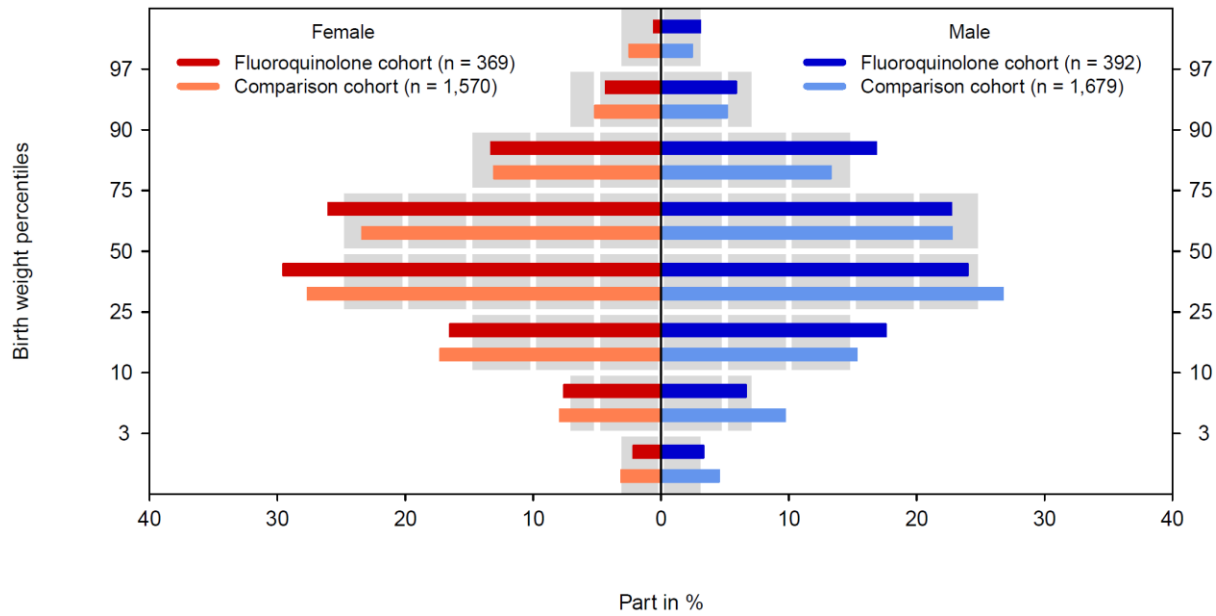

**FIG S1** Percentiles of birth weights. Colored bars give the distribution of fluoroquinolone exposed and comparison infants. Gray bars represent the German perinatal survey.

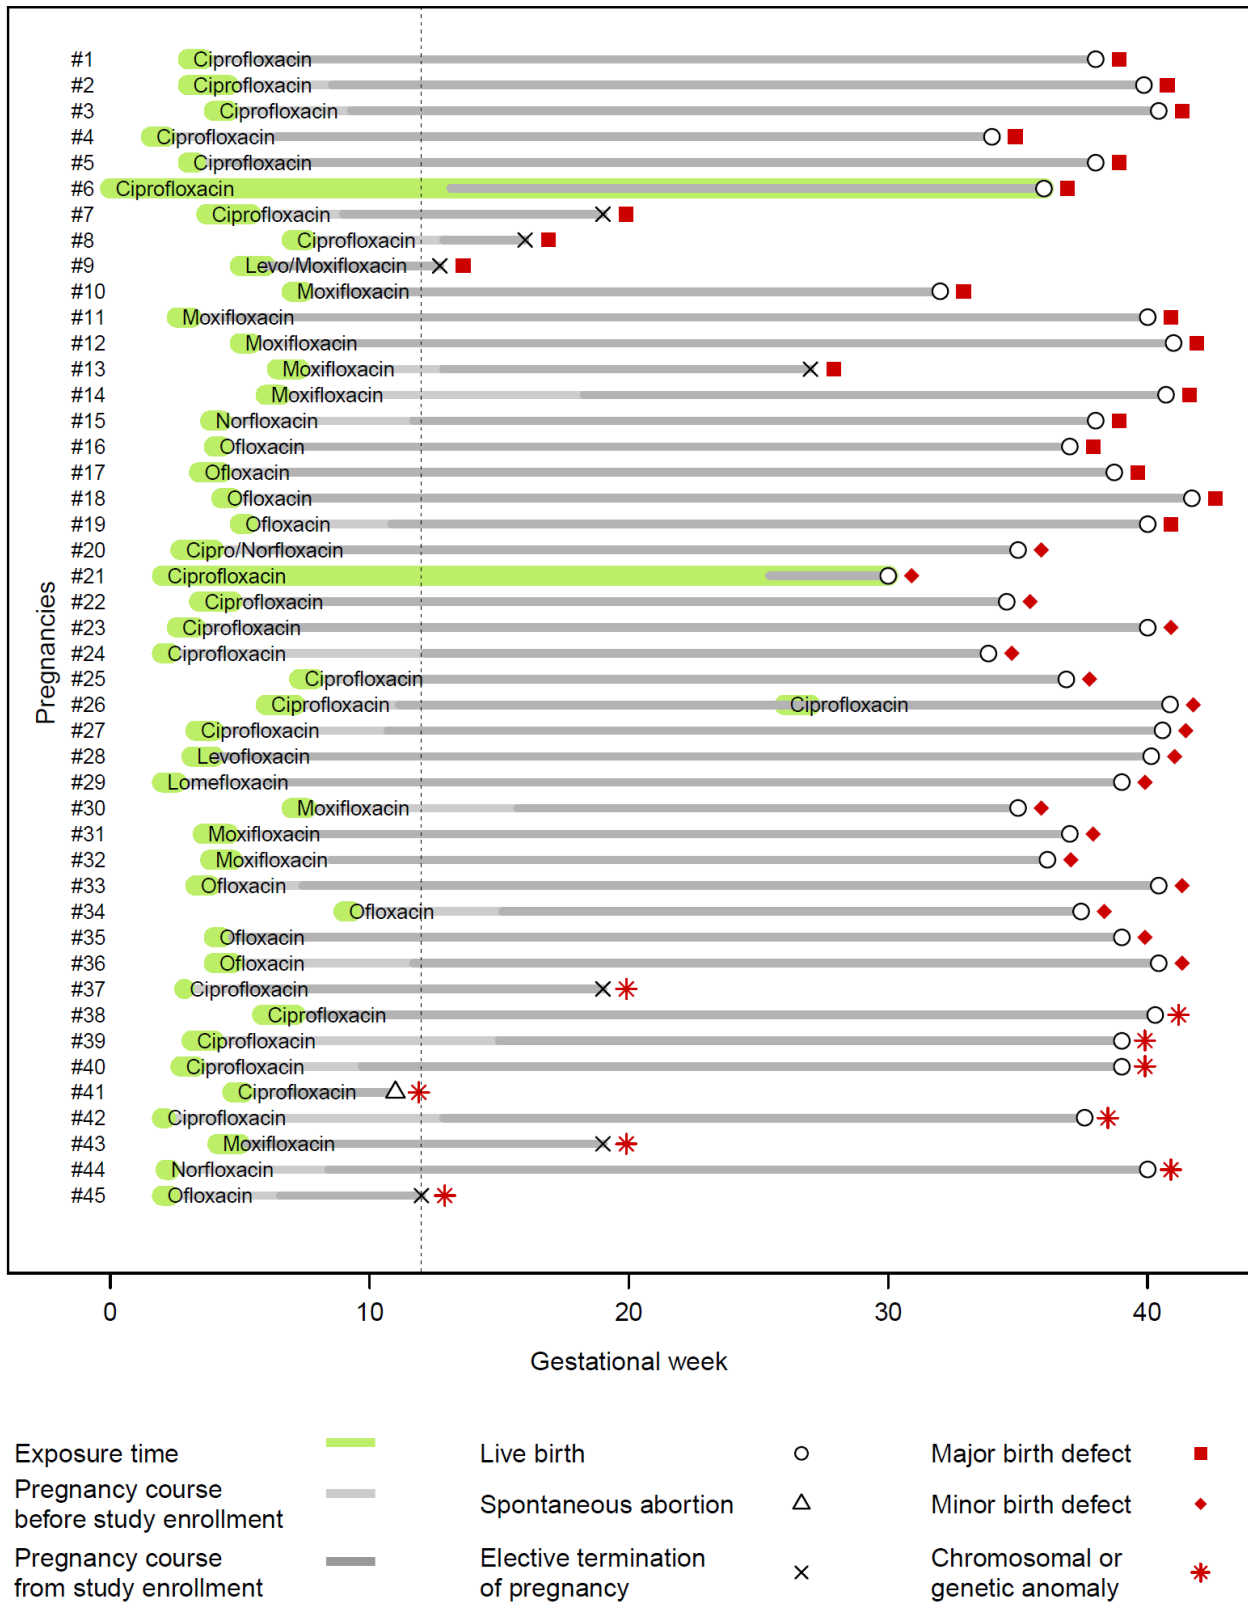

FIG S2 Birth defects and exposure time window of the fluoroquinolone cohort.

**TABLE S1** Treatment indication for fluoroquinolone therapy; multiple indications per pregnant women are possible

| <b>Treatment indication</b>                  | <b>951 (100)</b> |
|----------------------------------------------|------------------|
| Kidney and urinary tract infections          | 479 (50.4)       |
| Respiratory tract infections                 | 175 (18.4)       |
| Ear, nose, throat infections                 | 80 (8.4)         |
| Genital infections                           | 37 (3.9)         |
| Gastrointestinal infections                  | 27 (2.8)         |
| Not otherwise specified bacterial infections | 89 (9.4)         |
| Other indication                             | 49 (3.7)         |
| Unknown indication                           | 15 (1.6)         |

Data presented as number (%).

**TABLE S2** Gestational week at elective termination of pregnancy (ETOP) and reason for ETOP

|                                 | Study cohort                        | Comparison cohort                   |
|---------------------------------|-------------------------------------|-------------------------------------|
| <b>ETOPs</b>                    | 94                                  | 233                                 |
| <b>Gestational week at ETOP</b> | 68                                  | 170                                 |
| Gestational week at ETOP        | 10 <sup>a</sup> (8–12) <sup>b</sup> | 10 <sup>a</sup> (8–12) <sup>b</sup> |
| <b>Reason for ETOP</b>          | 94                                  | 233                                 |
| Social reason                   | 82 (87.2)                           | 196 (84.1)                          |
| Embryopathology                 | 7 (7.4)                             | 21 (9.0)                            |
| Maternal reason                 | 4 (4.3)                             | 12 (5.2)                            |
| Unknown reason                  | 1 (1.1)                             | 4 (1.7)                             |

Data presented as number (%) unless otherwise stated.

<sup>a</sup>Median.

<sup>b</sup>Interquartile range.

**TABLE S3** Minor birth defects in the fluoroquinolone cohort

| <b>GW at birth</b> | <b>Birth defect</b>                                                 | <b>Substance</b> | <b>Dosage (mg/day)</b> | <b>GW at exposure</b> |
|--------------------|---------------------------------------------------------------------|------------------|------------------------|-----------------------|
| 35                 | Pyloric stenosis, inguinal hernia                                   | Ciprofloxacin    | 500                    | 3 – 4                 |
|                    |                                                                     | Norfloxacin      | 500                    | 2 – 3                 |
| 30                 | Macrocephaly                                                        | Ciprofloxacin    | 1250                   | 0 – 30                |
| 34                 | Pyloric stenosis                                                    | Ciprofloxacin    | 2 x 500                | 3 – 4                 |
| 40                 | Inguinal hernia (operated 8 weeks after births)                     | Ciprofloxacin    | 250                    | 2 – 3                 |
| 33                 | Small hemangioma (right upper abdomen, 3x5 mm)                      | Ciprofloxacin    | 3 x 250                | Before 6              |
| 36                 | Macrocephaly                                                        | Ciprofloxacin    | 250                    | 7                     |
| 40                 | Microcephaly                                                        | Ciprofloxacin    | Unknown                | 6 – 7                 |
|                    |                                                                     | Ciprofloxacin    | Unknown                | 26                    |
| 40                 | Microcephaly                                                        | Ciprofloxacin    | 250                    | 3 – 4                 |
| 40                 | Macrocephaly                                                        | Levofloxacin     | 1000                   | 3 – 4                 |
| 39                 | Macrocephaly                                                        | Lomefloxacin     | 400                    | 2 – 3                 |
| 35                 | Pes adductus on both sides, inguinal testis left side               | Moxifloxacin     | 400                    | 7 – 8                 |
| 37                 | Osseous protrusion on the left lateral orbital margin               | Moxifloxacin     | 400                    | 3 – 4                 |
| 36                 | Hydrocele testis, false posture of both little toes                 | Moxifloxacin     | 400                    | 3 – 4                 |
| 40                 | Preauricular appendage, simian crease left side                     | Ofloxacin        | 100                    | 3                     |
| 37                 | Pes calcaneus on both sides (redressing therapy)                    | Ofloxacin        | Unknown                | 9 – 11                |
| 39                 | Slight pes calcaneus on both sides (4 weeks after birth normalized) | Ofloxacin        | 200                    | 4                     |
| 40                 | Microcephaly                                                        | Ofloxacin        | 400                    | 4                     |

GW, gestational week.

**TABLE S4** Congenital anomalies with chromosomal or genetic background in the fluoroquinolone cohort

| <b>GW at birth/<br/>ETOP / SAB</b> | <b>Birth defect</b>                            | <b>Substance</b> | <b>Dosage<br/>(mg/day)</b> | <b>GW at<br/>exposure</b> |
|------------------------------------|------------------------------------------------|------------------|----------------------------|---------------------------|
| 19 (ETOP)                          | Trisomy 21                                     | Ciprofloxacin    | 500                        | 2                         |
| 40                                 | Medium-chain acyl-CoA dehydrogenase deficiency | Ciprofloxacin    | 2 x 750                    | 5 – 7                     |
| 39                                 | Trisomy 21, patent foramen ovale               | Ciprofloxacin    | 250                        | 3 – 4                     |
| 39                                 | Trisomy 2 (mosaic, infant unsuspecting)        | Ciprofloxacin    | 2 x 250                    | 2 – 3                     |
| 11 (SAB)                           | Trisomy 18                                     | Ciprofloxacin    | 200                        | Before 5                  |
| 37                                 | Trisomy 21                                     | Ciprofloxacin    | Unknown                    | 1 – 2                     |
| 19 (ETOP)                          | Triple X syndrome                              | Moxifloxacin     | 400                        | 4 – 5                     |
| 40                                 | Phenylketonuria                                | Norfloxacin      | 800                        | 2 – 6                     |
| 12 (ETOP)                          | Turner syndrome                                | Ofloxacin        | Unknown                    | 2 – 3                     |

ETOP, elective termination of pregnancy; GW, gestational week; SAB, spontaneous abortion.

**TABLE S5** Major birth defects ordered by organ system. Several birth defects of the same organ are counted once. Two or more unrelated major structural malformations not classified as a syndrome are classified as multiple malformations.

| <b>Organ system</b>                   | <b>Study cohort<br/>(779<sup>a</sup>)</b> | <b>Comparison cohort<br/>(3,329<sup>b</sup>)</b> |
|---------------------------------------|-------------------------------------------|--------------------------------------------------|
| Major birth defects                   | 19 (2.4)                                  | 93 (2.8)                                         |
| Malformations of the nervous system   | 2 (0.3)                                   | 4 (0.1)                                          |
| Eye malformations                     | –                                         | 1 (0.03)                                         |
| Ear, face and neck malformations      | –                                         | –                                                |
| Heart defects                         | 9 (1.2)                                   | 28 (0.8)                                         |
| Respiratory defects                   | –                                         | 1 (0.03)                                         |
| Oro-facial clefts                     | 1 (0.1)                                   | 6 (0.2)                                          |
| Malformation of the digestive system  | –                                         | 6 (0.2)                                          |
| Abdominal wall defects                | 1 (0.1)                                   | 2 (0.06)                                         |
| Renal and urinary tract malformations | –                                         | 12 (0.4)                                         |
| Malformations of the genital tract    | 1 (0.1)                                   | 1 (0.03)                                         |
| Limb defects                          | 2 (0.3)                                   | 9 (0.3)                                          |
| Other malformations and syndromes     | 2 (0.3)                                   | 9 (0.3)                                          |
| Multiple malformations                | 1 (0.1)                                   | 14 (0.4)                                         |

Data presented as number (%); reference for each group is the total number of all live-born infants plus the number of pregnancy losses with major birth defects.

<sup>a</sup>775 live born infants + 4 elective terminations of pregnancy with major birth defects.

<sup>b</sup>3318 live born infants + 9 elective terminations of pregnancy and 2 spontaneous abortions with major defects.
